# Supplementary material for: Nucleophilicity of normal and abnormal N-heterocyclic carbenes at DFT: steric effects on tetrazole-5-ylidenes
Source: Royal Society of Chemistry journal article supplement (doi:10.1039/c5ra21247b), 2016-01-01
Supplement: c5ra21247b1.pdf [file c5ra21247b1.pdf]

## Supplementary

**Table 1** Hammett substituent constants,  $\sigma_m$  and  $\sigma_p$  for the substituents employed in this study

| substituent      | $\sigma_m$ | $\sigma_p$ |
|------------------|------------|------------|
| H                | 0.00       | 0.00       |
| methyl           | -0.07      | -0.17      |
| ethyl            | -0.07      | -0.15      |
| <i>i</i> -propyl | -0.07      | -0.15      |
| <i>t</i> -butyl  | -0.10      | -0.20      |

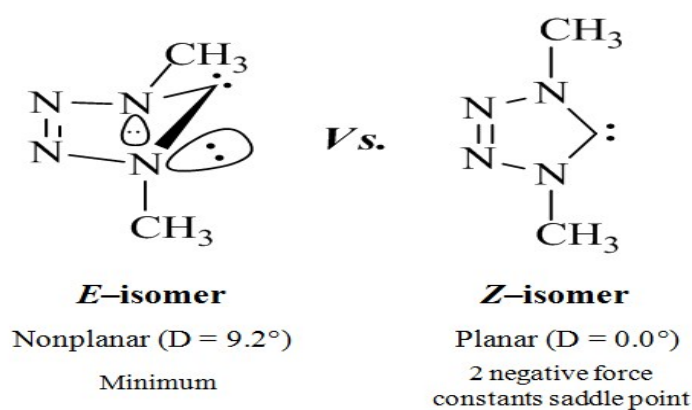

**Scheme 1** Possible structures for **1<sub>methyl</sub>** including nonplanar (*E*) minimum with 9.2 degrees of puckering vs. planar *Z* saddle point with 0.0 dihedral angle

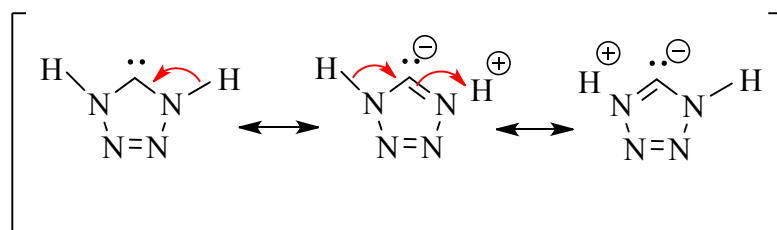

**Scheme 2** Possible canonical forms for normal carbene **1<sub>H</sub>**, displaying double bond character for  $C_{\text{carbene}}-\text{N}$  bonds
